# Supplementary figures and images for: Measures of Personal Recovery: A Systematic Review
Source: Atypon-hosted journal article supplement (doi:10.1176/appi.ps.005012012), 2013-07-03

**Figure 1: Flow diagram for measures**

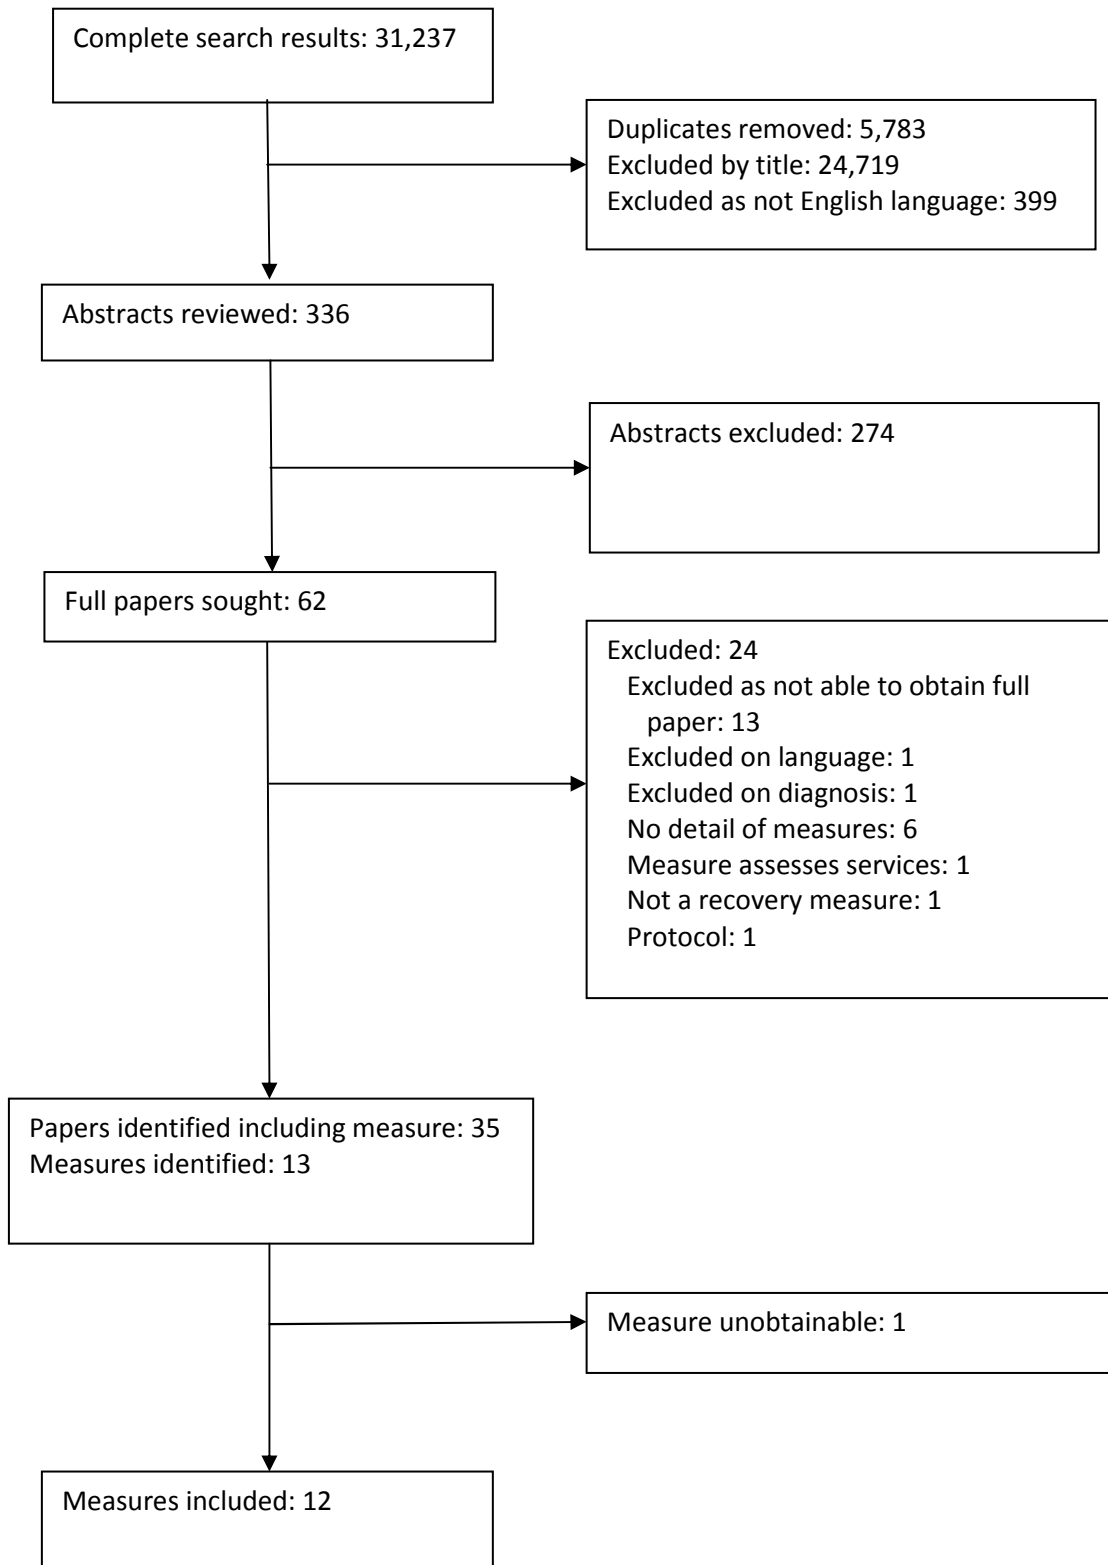

Supplement: 974_ds001.pdf [file 974_ds001.pdf]
